# Supplementary material for: Infrared spectroscopy of ‘forbidden’ peptide sequences
Source: Royal Society of Chemistry journal article supplement (doi:10.1039/b903039e), 2009-01-01
Supplement: b903039e.pdf [file b903039e.pdf]

## Infrared Spectroscopy of 'Forbidden' Peptide Sequences

Timothy D. Vaden,\* Sally A. N. Gowers, and Lavina C. Snoek\*

Department of Chemistry, Physical and Theoretical Chemistry Laboratory, University of Oxford, South Parks Road, Oxford OX1 3QZ, UK

### Supplementary Data

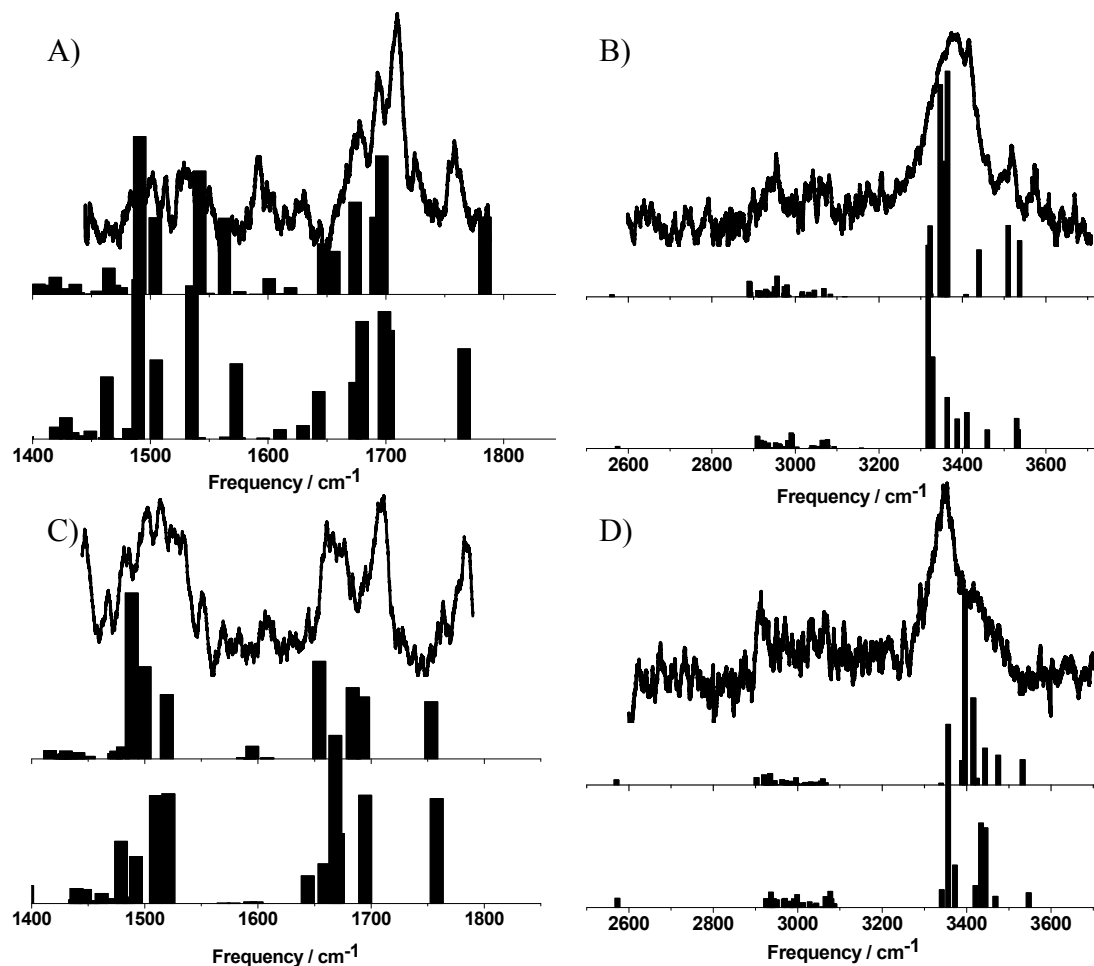

*Figure S1.* M05-2X/6-31G\* (upper stick spectra) and B3LYP/6-31G\* (lower stick spectra) frequencies, shown after scaling using recommended scaling factors (see ref 31) are compared for the 'best-fit' conformers, along with the experimental spectra. A) WCFNL, conformer W1, frequencies in the Amide I/II region. B) WCFNL, conformer W1, frequencies in the NH stretch region. C) FFMCT, conformer F4, frequencies in the Amide I/II region. D) FFMCT, conformer F4, frequencies in the NH stretch region.

\* To whom correspondence should be addressed: [timothy.vaden@chem.ox.ac.uk](mailto:timothy.vaden@chem.ox.ac.uk) and [lavina.snoek@chem.ox.ac.uk](mailto:lavina.snoek@chem.ox.ac.uk)

Cartesian coordinates of conformer **F1**, calculated at the M05-2X/6-31G\* level

| atom | x         | y         | z         |
|------|-----------|-----------|-----------|
| 1    | -1.530329 | -3.576335 | 1.671272  |
| 7    | -1.875531 | -3.296789 | 2.58321   |
| 6    | -1.395384 | -4.208271 | 3.611156  |
| 6    | 0.125004  | -4.202028 | 3.782215  |
| 8    | 0.649847  | -3.790117 | 4.817066  |
| 6    | -1.980182 | -5.623164 | 3.399991  |
| 6    | -1.854475 | -6.193262 | 2.004446  |
| 6    | -0.843711 | -7.101333 | 1.674642  |
| 6    | -2.779608 | -5.837822 | 1.018374  |
| 6    | -0.757419 | -7.642977 | 0.396005  |
| 6    | -2.706263 | -6.384281 | -0.25949  |
| 6    | -1.697078 | -7.295592 | -0.574547 |
| 1    | -1.758214 | -3.853612 | 4.576201  |
| 1    | -1.522601 | -6.304605 | 4.121143  |
| 1    | -3.041768 | -5.550118 | 3.643005  |
| 1    | -0.122766 | -7.388184 | 2.431284  |
| 1    | -3.561145 | -5.130071 | 1.266225  |
| 1    | 0.026719  | -8.352404 | 0.162819  |
| 1    | -3.443405 | -6.111658 | -1.004976 |
| 1    | -1.658566 | -7.751054 | -1.557878 |
| 1    | 0.417971  | -4.765723 | 1.83447   |
| 7    | 0.861602  | -4.661238 | 2.738497  |
| 6    | 2.307872  | -4.5128   | 2.759505  |
| 6    | 2.624615  | -3.072705 | 2.370166  |
| 8    | 2.829905  | -2.717314 | 1.206338  |
| 6    | 3.006125  | -5.505445 | 1.832198  |
| 6    | 4.50682   | -5.355479 | 1.955273  |
| 6    | 5.26151   | -4.758687 | 0.943978  |
| 6    | 5.151047  | -5.766145 | 3.125252  |
| 6    | 6.632454  | -4.573639 | 1.103332  |
| 6    | 6.520502  | -5.584755 | 3.286013  |
| 6    | 7.26558   | -4.985891 | 2.272752  |
| 1    | 2.627118  | -4.673361 | 3.789184  |
| 1    | 2.693746  | -6.510666 | 2.126469  |
| 1    | 2.684205  | -5.340015 | 0.802388  |
| 1    | 4.771411  | -4.440493 | 0.032122  |
| 1    | 4.574722  | -6.238536 | 3.914185  |
| 1    | 7.20522   | -4.107843 | 0.311347  |
| 1    | 7.005639  | -5.915155 | 4.196023  |
| 1    | 8.333446  | -4.848164 | 2.39134   |
| 1    | 2.129617  | -2.492499 | 4.225352  |
| 7    | 2.601531  | -2.184606 | 3.380236  |
| 6    | 2.619204  | -0.772108 | 3.039408  |
| 6    | 1.437036  | -0.510722 | 2.086605  |
| 8    | 0.370423  | -1.097692 | 2.25204   |
| 6    | 3.988512  | -0.31612  | 2.508368  |
| 6    | 5.138897  | -0.902192 | 3.321603  |
| 16   | 6.702545  | -0.168408 | 2.750404  |
| 6    | 7.840593  | -1.258536 | 3.650397  |
| 1    | 2.397456  | -0.230356 | 3.961374  |
| 1    | 4.10907   | -0.630547 | 1.471793  |
| 1    | 4.031742  | 0.776671  | 2.549105  |
| 1    | 5.004837  | -0.705396 | 4.388265  |
| 1    | 5.186524  | -1.98193  | 3.172046  |

|    |           |           |           |
|----|-----------|-----------|-----------|
| 1  | 8.853809  | -0.963743 | 3.382244  |
| 1  | 7.713821  | -1.14966  | 4.727412  |
| 1  | 7.679451  | -2.296996 | 3.360345  |
| 1  | 2.542625  | 0.729409  | 0.876977  |
| 7  | 1.619945  | 0.382155  | 1.095848  |
| 6  | 0.579929  | 0.667617  | 0.124017  |
| 6  | 0.585356  | -0.314062 | -1.06566  |
| 8  | 0.439371  | 0.08615   | -2.215414 |
| 6  | 0.69727   | 2.103325  | -0.376101 |
| 16 | 2.336919  | 2.492874  | -1.083591 |
| 1  | 2.176498  | 1.723934  | -2.171513 |
| 1  | -0.375536 | 0.539721  | 0.639214  |
| 1  | -0.066878 | 2.291604  | -1.124898 |
| 1  | 0.561111  | 2.789337  | 0.458833  |
| 1  | 0.731006  | -1.901762 | 0.230143  |
| 7  | 0.734261  | -1.61216  | -0.740916 |
| 6  | 0.691046  | -2.647679 | -1.747129 |
| 6  | 0.030302  | -3.860321 | -1.133827 |
| 8  | -0.142601 | -3.99324  | 0.060433  |
| 6  | 2.092752  | -3.107646 | -2.230013 |
| 8  | 2.679216  | -3.967204 | -1.270396 |
| 6  | 2.996725  | -1.928735 | -2.55153  |
| 1  | 2.789055  | -3.473538 | -0.434291 |
| 1  | 0.116643  | -2.282725 | -2.599713 |
| 1  | 1.933597  | -3.720298 | -3.118453 |
| 1  | 3.941887  | -2.301207 | -2.946208 |
| 1  | 2.533451  | -1.258997 | -3.276843 |
| 1  | 3.201366  | -1.363784 | -1.638778 |
| 1  | -1.497642 | -2.369467 | 2.749053  |
| 8  | -0.298834 | -4.784731 | -2.023914 |
| 1  | -0.662745 | -5.544099 | -1.522925 |

Cartesian coordinates of conformer **F2**, calculated at the M05-2X/6-31G\* level

| atomic # | x         | y         | z         |
|----------|-----------|-----------|-----------|
| 1        | -2.809282 | -5.181456 | 0.935113  |
| 7        | -1.85729  | -4.935977 | 1.190117  |
| 6        | -1.588916 | -5.395629 | 2.555265  |
| 6        | -0.184636 | -5.022484 | 3.03117   |
| 8        | 0.233791  | -5.444342 | 4.104094  |
| 6        | -1.799556 | -6.909224 | 2.771176  |
| 6        | -0.852748 | -7.756019 | 1.955574  |
| 6        | -1.152196 | -8.10086  | 0.634632  |
| 6        | 0.358528  | -8.192044 | 2.503758  |
| 6        | -0.260596 | -8.852932 | -0.127251 |
| 6        | 1.246264  | -8.950389 | 1.74673   |
| 6        | 0.941897  | -9.278911 | 0.427841  |
| 1        | -2.275322 | -4.862308 | 3.217634  |
| 1        | -1.6604   | -7.111315 | 3.832752  |
| 1        | -2.835398 | -7.148334 | 2.513972  |
| 1        | -2.100326 | -7.796463 | 0.203757  |
| 1        | 0.59879   | -7.920932 | 3.52427   |
| 1        | -0.510826 | -9.112096 | -1.14849  |
| 1        | 2.178618  | -9.282692 | 2.185849  |
| 1        | 1.636605  | -9.862862 | -0.161979 |
| 1        | 0.188914  | -3.874941 | 1.348044  |
| 7        | 0.543393  | -4.228195 | 2.224586  |
| 6        | 1.88662   | -3.84563  | 2.585377  |
| 6        | 2.173991  | -2.521124 | 1.898865  |
| 8        | 1.595803  | -2.219695 | 0.861166  |
| 6        | 2.922344  | -4.913335 | 2.142127  |
| 6        | 2.969416  | -5.078969 | 0.643604  |
| 6        | 3.915191  | -4.38988  | -0.118707 |
| 6        | 2.026194  | -5.8713   | -0.013323 |
| 6        | 3.910154  | -4.468912 | -1.506843 |
| 6        | 2.019107  | -5.956253 | -1.402764 |
| 6        | 2.956276  | -5.252016 | -2.153399 |
| 1        | 1.927815  | -3.745687 | 3.67154   |
| 1        | 3.905508  | -4.62695  | 2.525261  |
| 1        | 2.625403  | -5.843667 | 2.631172  |
| 1        | 4.662768  | -3.778171 | 0.373389  |
| 1        | 1.297335  | -6.425788 | 0.564643  |
| 1        | 4.639189  | -3.90626  | -2.075185 |
| 1        | 1.273065  | -6.568376 | -1.893661 |
| 1        | 2.941832  | -5.306117 | -3.234562 |
| 1        | 3.380909  | -1.911483 | 3.404702  |
| 7        | 3.142828  | -1.749132 | 2.440498  |
| 6        | 3.420261  | -0.431964 | 1.871986  |
| 6        | 2.085709  | 0.344014  | 1.787598  |
| 8        | 1.322141  | 0.319791  | 2.736402  |
| 6        | 4.24207   | -0.549685 | 0.58343   |
| 6        | 5.624421  | -1.126422 | 0.881124  |
| 16       | 6.505537  | -1.450091 | -0.676935 |
| 6        | 8.071708  | -2.031367 | 0.028553  |
| 1        | 4.01147   | 0.102493  | 2.619589  |
| 1        | 3.706614  | -1.174549 | -0.137678 |
| 1        | 4.382409  | 0.440914  | 0.143358  |
| 1        | 6.205335  | -0.418537 | 1.478691  |
| 1        | 5.534387  | -2.056462 | 1.445825  |

|    |           |           |           |
|----|-----------|-----------|-----------|
| 1  | 8.729723  | -2.280348 | -0.802176 |
| 1  | 8.541052  | -1.252344 | 0.629288  |
| 1  | 7.917499  | -2.923892 | 0.635217  |
| 1  | 2.476857  | 0.947157  | -0.138377 |
| 7  | 1.855991  | 1.044564  | 0.650268  |
| 6  | 0.571616  | 1.657935  | 0.373742  |
| 6  | -0.23558  | 0.853736  | -0.663748 |
| 8  | -1.107097 | 1.394423  | -1.334859 |
| 6  | 0.7242    | 3.097833  | -0.103363 |
| 16 | 1.697034  | 3.226992  | -1.646156 |
| 1  | 0.723682  | 2.742808  | -2.434842 |
| 1  | 0.014146  | 1.640727  | 1.312756  |
| 1  | -0.257286 | 3.53418   | -0.2664   |
| 1  | 1.260532  | 3.67739   | 0.646165  |
| 1  | 0.855153  | -0.804903 | -0.17415  |
| 7  | 0.108026  | -0.439458 | -0.747656 |
| 6  | -0.48777  | -1.371219 | -1.671589 |
| 6  | -0.875716 | -2.634642 | -0.909048 |
| 8  | -0.523532 | -3.751329 | -1.249571 |
| 6  | 0.490704  | -1.713829 | -2.805178 |
| 8  | 1.707552  | -2.200311 | -2.265095 |
| 6  | 0.831629  | -0.486555 | -3.629154 |
| 1  | 1.524869  | -3.054727 | -1.843795 |
| 1  | -1.396342 | -0.908512 | -2.065208 |
| 1  | 0.01818   | -2.473885 | -3.436444 |
| 1  | 1.482553  | -0.769596 | -4.45602  |
| 1  | -0.069341 | -0.011505 | -4.020774 |
| 1  | 1.365221  | 0.231807  | -3.004548 |
| 1  | -1.2512   | -5.401196 | 0.51583   |
| 8  | -1.618275 | -2.39792  | 0.157921  |
| 1  | -1.769796 | -3.278173 | 0.62381   |

Cartesian coordinates of conformer **F3**, calculated at the M05-2X/6-31G\* level

| atomic # | x         | y         | z         |
|----------|-----------|-----------|-----------|
| 1        | -0.169762 | -8.790781 | 3.355693  |
| 7        | -0.383157 | -8.715631 | 2.365134  |
| 6        | -0.638    | -7.304873 | 2.06381   |
| 6        | 0.540887  | -6.462333 | 2.547203  |
| 8        | 0.733987  | -6.239765 | 3.736933  |
| 6        | -1.926204 | -6.880598 | 2.772696  |
| 6        | -2.426619 | -5.513734 | 2.371829  |
| 6        | -3.412143 | -5.383366 | 1.387556  |
| 6        | -1.926932 | -4.356949 | 2.974224  |
| 6        | -3.911252 | -4.129122 | 1.037571  |
| 6        | -2.407873 | -3.100969 | 2.613848  |
| 6        | -3.411089 | -2.982881 | 1.655906  |
| 1        | -0.759559 | -7.19521  | 0.984077  |
| 1        | -2.676343 | -7.639194 | 2.545073  |
| 1        | -1.734564 | -6.904261 | 3.848202  |
| 1        | -3.806402 | -6.273829 | 0.910936  |
| 1        | -1.148781 | -4.447656 | 3.721352  |
| 1        | -4.687612 | -4.047449 | 0.286857  |
| 1        | -1.990108 | -2.214581 | 3.07387   |
| 1        | -3.788943 | -2.00709  | 1.379469  |
| 1        | 1.084417  | -5.995704 | 0.648083  |
| 7        | 1.439947  | -6.094542 | 1.591833  |
| 6        | 2.507844  | -5.206327 | 1.984614  |
| 6        | 1.92335   | -3.83502  | 2.342194  |
| 8        | 0.857618  | -3.451881 | 1.862723  |
| 6        | 3.517104  | -5.085993 | 0.827804  |
| 6        | 4.735721  | -4.253286 | 1.148603  |
| 6        | 5.073639  | -3.167638 | 0.336439  |
| 6        | 5.551062  | -4.557981 | 2.24346   |
| 6        | 6.187329  | -2.382115 | 0.635694  |
| 6        | 6.664195  | -3.775899 | 2.538791  |
| 6        | 6.980108  | -2.677785 | 1.740269  |
| 1        | 2.984468  | -5.628245 | 2.870245  |
| 1        | 3.812475  | -6.102711 | 0.55547   |
| 1        | 3.012604  | -4.649093 | -0.036374 |
| 1        | 4.477547  | -2.969697 | -0.550961 |
| 1        | 5.324516  | -5.42156  | 2.860409  |
| 1        | 6.441956  | -1.544609 | -0.002231 |
| 1        | 7.286123  | -4.023009 | 3.39007   |
| 1        | 7.837023  | -2.061464 | 1.9787    |
| 1        | 3.50617   | -3.421196 | 3.555112  |
| 7        | 2.667436  | -3.044766 | 3.141264  |
| 6        | 2.187148  | -1.741704 | 3.575824  |
| 6        | 1.887578  | -0.788133 | 2.416695  |
| 8        | 1.099941  | 0.129763  | 2.576784  |
| 6        | 3.203079  | -1.097366 | 4.529081  |
| 6        | 4.565261  | -0.863232 | 3.8755    |
| 16       | 5.811074  | -0.192278 | 5.016156  |
| 6        | 5.222254  | 1.523944  | 5.108735  |
| 1        | 1.228563  | -1.859151 | 4.084625  |
| 1        | 2.774532  | -0.150014 | 4.859166  |
| 1        | 3.317752  | -1.731647 | 5.411933  |
| 1        | 4.995023  | -1.795651 | 3.504505  |
| 1        | 4.480819  | -0.185451 | 3.023558  |

|    |           |           |           |
|----|-----------|-----------|-----------|
| 1  | 5.15001   | 1.949662  | 4.108081  |
| 1  | 4.259682  | 1.593407  | 5.61324   |
| 1  | 5.958679  | 2.084248  | 5.682449  |
| 1  | 3.268152  | -1.732175 | 1.23709   |
| 7  | 2.560052  | -1.010725 | 1.259712  |
| 6  | 2.284727  | -0.251569 | 0.065108  |
| 6  | 1.897339  | -1.172745 | -1.099397 |
| 8  | 2.071456  | -0.833214 | -2.268391 |
| 6  | 3.425626  | 0.671564  | -0.358468 |
| 16 | 3.896202  | 1.849204  | 0.956308  |
| 1  | 2.645015  | 2.110356  | 1.370412  |
| 1  | 1.404611  | 0.354408  | 0.297843  |
| 1  | 4.322265  | 0.090772  | -0.579219 |
| 1  | 3.137299  | 1.198803  | -1.263485 |
| 1  | 1.136775  | -2.517706 | 0.237457  |
| 7  | 1.347656  | -2.346453 | -0.741508 |
| 6  | 0.784781  | -3.234452 | -1.745531 |
| 6  | -0.229078 | -4.120388 | -1.027017 |
| 8  | -0.118734 | -5.321547 | -0.892331 |
| 6  | 1.835234  | -4.082615 | -2.495718 |
| 8  | 3.067073  | -3.400488 | -2.623125 |
| 6  | 1.282696  | -4.506986 | -3.849665 |
| 1  | 2.872465  | -2.498809 | -2.930556 |
| 1  | 0.240154  | -2.616078 | -2.467109 |
| 1  | 2.04556   | -4.973389 | -1.905595 |
| 1  | 2.012339  | -5.131423 | -4.363895 |
| 1  | 0.355954  | -5.073232 | -3.733598 |
| 1  | 1.083569  | -3.626655 | -4.46641  |
| 1  | 0.442776  | -9.029208 | 1.866514  |
| 8  | -1.236739 | -3.406871 | -0.553533 |
| 1  | -1.819696 | -3.97009  | -0.004876 |

Cartesian coordinates of conformer **F4**, calculated at the M05-2X/6-31G\* level

| atomic # | x         | y         | z         |
|----------|-----------|-----------|-----------|
| 1        | -1.928717 | -3.758031 | 1.808399  |
| 7        | -2.140775 | -3.481982 | 2.760315  |
| 6        | -1.751679 | -4.484569 | 3.733086  |
| 6        | -0.251331 | -4.756491 | 3.917685  |
| 8        | 0.165497  | -5.479975 | 4.814674  |
| 6        | -2.452588 | -5.822479 | 3.428783  |
| 6        | -2.084992 | -6.35244  | 2.06397   |
| 6        | -0.878014 | -7.035096 | 1.869471  |
| 6        | -2.912291 | -6.12825  | 0.960755  |
| 6        | -0.505712 | -7.474616 | 0.600783  |
| 6        | -2.549103 | -6.576627 | -0.30798  |
| 6        | -1.343253 | -7.247742 | -0.492922 |
| 1        | -2.093803 | -4.157086 | 4.717651  |
| 1        | -2.164148 | -6.534512 | 4.202812  |
| 1        | -3.528546 | -5.654754 | 3.485959  |
| 1        | -0.233881 | -7.218574 | 2.72188   |
| 1        | -3.843672 | -5.592311 | 1.101676  |
| 1        | 0.438221  | -7.985916 | 0.461362  |
| 1        | -3.202017 | -6.391128 | -1.151264 |
| 1        | -1.047115 | -7.581428 | -1.478721 |
| 1        | 0.170708  | -3.634976 | 2.258981  |
| 7        | 0.565404  | -4.153667 | 3.028333  |
| 6        | 2.008289  | -4.267306 | 3.102527  |
| 6        | 2.500969  | -3.038345 | 2.364035  |
| 8        | 2.297361  | -2.939345 | 1.150439  |
| 6        | 2.547199  | -5.541851 | 2.433031  |
| 6        | 4.051213  | -5.491034 | 2.324402  |
| 6        | 4.65785   | -5.211356 | 1.097294  |
| 6        | 4.855715  | -5.655475 | 3.454305  |
| 6        | 6.042672  | -5.106753 | 1.000032  |
| 6        | 6.240657  | -5.548333 | 3.359778  |
| 6        | 6.837426  | -5.271405 | 2.131569  |
| 1        | 2.297117  | -4.252758 | 4.155227  |
| 1        | 2.217048  | -6.390016 | 3.035753  |
| 1        | 2.101255  | -5.622065 | 1.440378  |
| 1        | 4.031771  | -5.084986 | 0.22103   |
| 1        | 4.394209  | -5.885239 | 4.408904  |
| 1        | 6.500414  | -4.899061 | 0.040832  |
| 1        | 6.853671  | -5.691885 | 4.241433  |
| 1        | 7.915027  | -5.193143 | 2.056704  |
| 1        | 3.154154  | -2.123259 | 4.063751  |
| 7        | 3.057522  | -2.045471 | 3.065325  |
| 6        | 3.245117  | -0.751977 | 2.42974   |
| 6        | 1.885276  | -0.339086 | 1.826458  |
| 8        | 0.847987  | -0.600912 | 2.416404  |
| 6        | 4.435549  | -0.752321 | 1.459117  |
| 6        | 5.666444  | -1.434019 | 2.051201  |
| 16       | 6.139568  | -0.668908 | 3.637376  |
| 6        | 7.4925    | -1.799069 | 4.068388  |
| 1        | 3.441175  | -0.04232  | 3.235364  |
| 1        | 4.165537  | -1.284395 | 0.544655  |
| 1        | 4.675968  | 0.282464  | 1.200472  |
| 1        | 5.463023  | -2.492557 | 2.219991  |
| 1        | 6.500355  | -1.351041 | 1.352578  |



|    |           |           |           |
|----|-----------|-----------|-----------|
| 1  | 8.293953  | -1.736368 | 3.332597  |
| 1  | 7.877227  | -1.494752 | 5.040093  |
| 1  | 7.125477  | -2.823383 | 4.126873  |
| 1  | 2.727679  | 0.201763  | 0.060382  |
| 7  | 1.918369  | 0.345519  | 0.651065  |
| 6  | 0.672983  | 0.618892  | -0.064292 |
| 6  | 0.487487  | -0.466661 | -1.138403 |
| 8  | 0.352647  | -0.19272  | -2.326007 |
| 6  | 0.698527  | 1.996773  | -0.708383 |
| 16 | 0.723075  | 3.342718  | 0.518295  |
| 1  | 1.811044  | 2.899749  | 1.169508  |
| 1  | -0.126778 | 0.55572   | 0.673915  |
| 1  | 1.544431  | 2.083327  | -1.389821 |
| 1  | -0.204962 | 2.131669  | -1.299788 |
| 1  | 0.830619  | -1.848106 | 0.302528  |
| 7  | 0.554327  | -1.729969 | -0.661983 |
| 6  | 1.003356  | -2.779878 | -1.545686 |
| 6  | 0.76858   | -4.148443 | -0.930829 |
| 8  | 1.430674  | -5.123336 | -1.199597 |
| 6  | 2.510069  | -2.636732 | -1.936032 |
| 8  | 2.932508  | -1.277091 | -1.901638 |
| 6  | 2.772729  | -3.245607 | -3.304    |
| 1  | 2.415942  | -0.798959 | -2.568755 |
| 1  | 0.394924  | -2.725676 | -2.453927 |
| 1  | 3.103887  | -3.133958 | -1.172778 |
| 1  | 3.830863  | -3.158039 | -3.551152 |
| 1  | 2.487553  | -4.296836 | -3.315143 |
| 1  | 2.193473  | -2.714095 | -4.065343 |
| 1  | -1.717585 | -2.580039 | 2.943662  |
| 8  | -0.27298  | -4.195421 | -0.086162 |
| 1  | -0.370229 | -5.133684 | 0.176619  |

Cartesian coordinates of conformer **F5**, calculated at the M05-2X/6-31G\* level

| atomic # | x         | y         | z         |
|----------|-----------|-----------|-----------|
| 1        | -2.123028 | -4.923819 | 1.946201  |
| 7        | -2.313939 | -5.030028 | 2.935626  |
| 6        | -1.410151 | -5.968188 | 3.569971  |
| 6        | 0.090285  | -5.654883 | 3.517588  |
| 8        | 0.917054  | -6.417836 | 4.009655  |
| 6        | -1.617246 | -7.380874 | 2.990337  |
| 6        | -1.267525 | -7.449183 | 1.523788  |
| 6        | 0.033226  | -7.764284 | 1.118989  |
| 6        | -2.224941 | -7.169214 | 0.545405  |
| 6        | 0.370673  | -7.793065 | -0.230676 |
| 6        | -1.891216 | -7.203977 | -0.805677 |
| 6        | -0.591881 | -7.514976 | -1.197515 |
| 1        | -1.656583 | -6.014923 | 4.634077  |
| 1        | -0.992767 | -8.071832 | 3.55591   |
| 1        | -2.665045 | -7.643828 | 3.140912  |
| 1        | 0.776286  | -7.988336 | 1.875649  |
| 1        | -3.23709  | -6.929666 | 0.851058  |
| 1        | 1.38216   | -8.04013  | -0.528708 |
| 1        | -2.647022 | -6.991237 | -1.551974 |
| 1        | -0.331007 | -7.546762 | -2.24817  |
| 1        | -0.224551 | -3.894927 | 2.474028  |
| 7        | 0.454094  | -4.503184 | 2.908212  |
| 6        | 1.850981  | -4.171988 | 2.788961  |
| 6        | 1.979557  | -2.654202 | 2.729511  |
| 8        | 1.032399  | -1.938147 | 2.398603  |
| 6        | 2.469447  | -4.873644 | 1.551653  |
| 6        | 3.941045  | -4.602115 | 1.37942   |
| 6        | 4.852364  | -4.931402 | 2.389349  |
| 6        | 4.412363  | -3.973932 | 0.223996  |
| 6        | 6.196114  | -4.587133 | 2.269567  |
| 6        | 5.760048  | -3.636192 | 0.10121   |
| 6        | 6.65117   | -3.925547 | 1.130057  |
| 1        | 2.349776  | -4.547239 | 3.68422   |
| 1        | 2.28513   | -5.939086 | 1.70201   |
| 1        | 1.928734  | -4.565724 | 0.655023  |
| 1        | 4.505695  | -5.465561 | 3.268372  |
| 1        | 3.710575  | -3.769095 | -0.580691 |
| 1        | 6.890245  | -4.844677 | 3.059921  |
| 1        | 6.117441  | -3.148761 | -0.797531 |
| 1        | 7.694722  | -3.654773 | 1.036853  |
| 1        | 3.945621  | -2.780002 | 3.246527  |
| 7        | 3.190442  | -2.144268 | 3.033885  |
| 6        | 3.438725  | -0.71182  | 3.067968  |
| 6        | 3.309707  | -0.012763 | 1.717537  |
| 8        | 3.160731  | 1.199006  | 1.67757   |
| 6        | 4.829795  | -0.434499 | 3.637832  |
| 6        | 4.945947  | -0.674694 | 5.143517  |
| 16       | 3.718794  | 0.221304  | 6.149943  |
| 6        | 3.95662   | 1.9026    | 5.501485  |
| 1        | 2.681225  | -0.242214 | 3.698449  |
| 1        | 5.564907  | -1.053704 | 3.109932  |
| 1        | 5.076518  | 0.60216   | 3.408337  |
| 1        | 4.795086  | -1.72761  | 5.390554  |
| 1        | 5.949834  | -0.402128 | 5.473381  |

|    |           |           |           |
|----|-----------|-----------|-----------|
| 1  | 3.369608  | 2.56499   | 6.135423  |
| 1  | 5.004778  | 2.196579  | 5.564103  |
| 1  | 3.602185  | 1.991922  | 4.474222  |
| 1  | 3.640094  | -1.776526 | 0.74864   |
| 7  | 3.377747  | -0.808311 | 0.626621  |
| 6  | 3.14025   | -0.311219 | -0.704112 |
| 6  | 1.935641  | -1.025177 | -1.332231 |
| 8  | 1.812675  | -1.13278  | -2.551132 |
| 6  | 4.352158  | -0.429116 | -1.628313 |
| 16 | 5.862579  | 0.29938   | -0.91417  |
| 1  | 5.313262  | 1.481368  | -0.587962 |
| 1  | 2.875272  | 0.742772  | -0.58494  |
| 1  | 4.587051  | -1.478432 | -1.811785 |
| 1  | 4.114372  | 0.022033  | -2.58788  |
| 1  | 1.200255  | -1.383624 | 0.544349  |
| 7  | 1.044026  | -1.503897 | -0.449533 |
| 6  | -0.174743 | -2.14514  | -0.893115 |
| 6  | -1.188148 | -2.019782 | 0.233309  |
| 8  | -1.749839 | -2.942595 | 0.777664  |
| 6  | 0.008541  | -3.619106 | -1.322809 |
| 8  | 1.28605   | -3.827503 | -1.896201 |
| 6  | -1.106372 | -4.013227 | -2.280844 |
| 1  | 1.435976  | -3.122087 | -2.547771 |
| 1  | -0.552172 | -1.570913 | -1.74644  |
| 1  | -0.031573 | -4.25543  | -0.437871 |
| 1  | -0.96626  | -5.04594  | -2.593396 |
| 1  | -2.082241 | -3.923243 | -1.799351 |
| 1  | -1.08473  | -3.372067 | -3.166618 |
| 1  | -2.278163 | -4.112133 | 3.359853  |
| 8  | -1.392547 | -0.744534 | 0.570736  |
| 1  | -1.995572 | -0.741167 | 1.33244   |

Cartesian coordinates of conformer **W1**, calculated at the M05-2X/6-31G\* level

| atomic # | x         | y         | z         |
|----------|-----------|-----------|-----------|
| 1        | -0.436785 | 3.681812  | 0.451404  |
| 7        | 0.044986  | 3.974495  | -0.389705 |
| 6        | -0.577548 | 3.349564  | -1.558908 |
| 6        | 0.409156  | 3.364146  | -2.729225 |
| 8        | 0.063277  | 3.203986  | -3.900271 |
| 6        | -1.941996 | 3.949091  | -1.974944 |
| 6        | -2.848534 | 2.949237  | -2.618815 |
| 6        | -3.047876 | 2.739826  | -3.954285 |
| 6        | -3.612126 | 1.938524  | -1.939745 |
| 7        | -3.884803 | 1.673268  | -4.157765 |
| 6        | -4.237595 | 1.151354  | -2.94019  |
| 6        | -3.813793 | 1.613423  | -0.590227 |
| 6        | -5.044357 | 0.054745  | -2.622467 |
| 6        | -4.612062 | 0.527455  | -0.272068 |
| 6        | -5.219184 | -0.245941 | -1.281282 |
| 1        | -4.024571 | 1.253993  | -5.071577 |
| 1        | -0.731611 | 2.291989  | -1.322417 |
| 1        | -2.411069 | 4.331377  | -1.062506 |
| 1        | -1.779991 | 4.802541  | -2.637487 |
| 1        | -2.632213 | 3.280228  | -4.788021 |
| 1        | -3.352688 | 2.204138  | 0.194146  |
| 1        | -5.515542 | -0.53634  | -3.397822 |
| 1        | -4.777036 | 0.266063  | 0.765543  |
| 1        | -5.838011 | -1.089267 | -1.002333 |
| 1        | 1.900382  | 3.63926   | -1.388155 |
| 7        | 1.703135  | 3.531431  | -2.376674 |
| 6        | 2.739052  | 3.710653  | -3.366453 |
| 6        | 3.276328  | 2.41318   | -3.976873 |
| 8        | 4.248629  | 2.448006  | -4.719913 |
| 6        | 3.896293  | 4.546518  | -2.830995 |
| 16       | 4.745169  | 3.779516  | -1.407952 |
| 1        | 5.28532   | 2.772431  | -2.113736 |
| 1        | 2.29326   | 4.238303  | -4.216548 |
| 1        | 4.610623  | 4.711312  | -3.633174 |
| 1        | 3.527078  | 5.509412  | -2.480171 |
| 1        | 1.812189  | 1.333514  | -3.049142 |
| 7        | 2.588234  | 1.288054  | -3.693027 |
| 6        | 2.787236  | 0.072996  | -4.446605 |
| 6        | 1.95544   | 0.02645   | -5.729649 |
| 8        | 2.116951  | -0.908139 | -6.516947 |
| 6        | 2.445629  | -1.162711 | -3.592983 |
| 6        | 1.050386  | -1.073335 | -3.020605 |
| 6        | -0.068224 | -1.331067 | -3.820969 |
| 6        | 0.851767  | -0.669379 | -1.698331 |
| 6        | -1.353312 | -1.178413 | -3.311943 |
| 6        | -0.436608 | -0.53491  | -1.182548 |
| 6        | -1.542615 | -0.784302 | -1.988433 |
| 1        | 3.830079  | 0.03412   | -4.760273 |
| 1        | 2.551341  | -2.037919 | -4.234709 |
| 1        | 3.178154  | -1.234232 | -2.787255 |
| 1        | 0.075996  | -1.665169 | -4.842764 |
| 1        | 1.713036  | -0.477698 | -1.066388 |
| 1        | -2.211832 | -1.369482 | -3.944326 |
| 1        | -0.578172 | -0.239923 | -0.149509 |

|   |           |           |            |
|---|-----------|-----------|------------|
| 1 | -2.542629 | -0.677386 | -1.590582  |
| 1 | 0.907645  | 1.723671  | -5.226584  |
| 7 | 1.043867  | 0.995803  | -5.921993  |
| 6 | 0.084316  | 0.913809  | -7.020959  |
| 6 | 0.719333  | 1.519037  | -8.286619  |
| 8 | 0.305774  | 2.562111  | -8.797161  |
| 6 | -1.189411 | 1.643652  | -6.590726  |
| 6 | -2.431116 | 1.321177  | -7.410025  |
| 8 | -3.446569 | 0.860752  | -6.89046   |
| 7 | -2.347463 | 1.572432  | -8.72847   |
| 1 | -3.17551  | 1.432475  | -9.283221  |
| 1 | -1.55632  | 2.087128  | -9.094349  |
| 1 | -0.110966 | -0.146422 | -7.202371  |
| 1 | -1.410381 | 1.358722  | -5.563676  |
| 1 | -1.000573 | 2.719587  | -6.624119  |
| 1 | 2.053702  | -0.008732 | -8.263061  |
| 7 | 1.764825  | 0.830417  | -8.758476  |
| 6 | 2.58798   | 1.373274  | -9.823263  |
| 6 | 3.511788  | 0.312659  | -10.391619 |
| 8 | 4.402495  | 0.546978  | -11.167634 |
| 6 | 3.373624  | 2.631388  | -9.406597  |
| 6 | 4.031954  | 2.552946  | -8.026401  |
| 6 | 4.964669  | 1.350603  | -7.873655  |
| 6 | 4.794707  | 3.850335  | -7.755854  |
| 1 | 1.927517  | 1.655046  | -10.649383 |
| 1 | 4.128543  | 2.811094  | -10.176342 |
| 1 | 2.674547  | 3.46869   | -9.418037  |
| 1 | 3.244738  | 2.467454  | -7.271264  |
| 1 | 4.42631   | 0.400628  | -7.933062  |
| 1 | 5.4501    | 1.386831  | -6.897016  |
| 1 | 5.735072  | 1.357851  | -8.650088  |
| 1 | 5.182302  | 3.850809  | -6.736476  |
| 1 | 5.634652  | 3.951804  | -8.449264  |
| 1 | 4.147126  | 4.721908  | -7.881933  |
| 1 | -0.053257 | 4.983466  | -0.447113  |
| 8 | 3.221474  | -0.93393  | -9.974317  |
| 1 | 3.871161  | -1.521253 | -10.393811 |

Cartesian coordinates of conformer **W2**, calculated at the M05-2X/6-31G\* level

| atomic # | x         | y         | z         |
|----------|-----------|-----------|-----------|
| 1        | 4.626077  | 25.00781  | -0.954438 |
| 7        | 3.914718  | 24.650104 | -0.326587 |
| 6        | 3.283841  | 23.461362 | -0.900887 |
| 6        | 2.524693  | 23.842188 | -2.169139 |
| 8        | 1.481672  | 24.504126 | -2.108156 |
| 6        | 2.304252  | 22.881535 | 0.121344  |
| 6        | 1.640645  | 21.617098 | -0.333708 |
| 6        | 0.436986  | 21.505659 | -0.976025 |
| 6        | 2.13049   | 20.27319  | -0.17774  |
| 7        | 0.132271  | 20.185596 | -1.205847 |
| 6        | 1.152812  | 19.403779 | -0.727518 |
| 6        | 3.297045  | 19.722517 | 0.373975  |
| 6        | 1.318209  | 18.012327 | -0.743815 |
| 6        | 3.46543   | 18.347655 | 0.357527  |
| 6        | 2.487412  | 17.501292 | -0.201486 |
| 1        | -0.655542 | 19.892573 | -1.765743 |
| 1        | 4.057005  | 22.728283 | -1.134067 |
| 1        | 2.859248  | 22.716041 | 1.046556  |
| 1        | 1.547001  | 23.64275  | 0.321331  |
| 1        | -0.247445 | 22.283106 | -1.275955 |
| 1        | 4.058458  | 20.366239 | 0.797825  |
| 1        | 0.55957   | 17.358035 | -1.15799  |
| 1        | 4.363804  | 17.912596 | 0.776185  |
| 1        | 2.646104  | 16.430478 | -0.199286 |
| 7        | 3.094449  | 23.506565 | -3.344122 |
| 6        | 2.575879  | 24.005074 | -4.613137 |
| 6        | 1.437213  | 23.107255 | -5.125626 |
| 8        | 1.542493  | 22.441826 | -6.160023 |
| 6        | 3.714574  | 24.110716 | -5.619568 |
| 16       | 3.260762  | 24.984479 | -7.154407 |
| 1        | 2.5721    | 23.961515 | -7.680158 |
| 1        | 2.151898  | 24.993474 | -4.422033 |
| 1        | 4.514736  | 24.698636 | -5.170544 |
| 1        | 4.100808  | 23.123302 | -5.860142 |
| 1        | 3.207093  | 25.373607 | -0.238621 |
| 7        | 0.34207   | 23.127684 | -4.345201 |
| 6        | -0.9309   | 22.476548 | -4.641818 |
| 6        | -0.849881 | 20.956278 | -4.456437 |
| 8        | -1.465066 | 20.398698 | -3.550866 |
| 6        | -1.514183 | 22.876769 | -6.01275  |
| 6        | -1.721746 | 24.368191 | -6.090896 |
| 6        | -0.723537 | 25.191499 | -6.612672 |
| 6        | -2.885097 | 24.95289  | -5.588682 |
| 6        | -0.881716 | 26.573652 | -6.630802 |
| 6        | -3.049356 | 26.334364 | -5.609747 |
| 6        | -2.046227 | 27.148201 | -6.129785 |
| 1        | -1.621687 | 22.808163 | -3.868237 |
| 1        | -0.847209 | 22.545649 | -6.807458 |
| 1        | -2.465179 | 22.350551 | -6.128005 |
| 1        | 0.18315   | 24.747607 | -7.005811 |
| 1        | -3.668356 | 24.320834 | -5.183299 |
| 1        | -0.093131 | 27.195975 | -7.034797 |
| 1        | -3.959302 | 26.774568 | -5.221677 |
| 1        | -2.173042 | 28.223243 | -6.144874 |

|   |           |           |           |
|---|-----------|-----------|-----------|
| 7 | -0.08539  | 20.303303 | -5.358885 |
| 6 | 0.326354  | 18.924359 | -5.152904 |
| 6 | 1.839875  | 18.983456 | -4.982047 |
| 8 | 2.543     | 19.17682  | -5.986677 |
| 6 | -0.022171 | 18.046252 | -6.34581  |
| 6 | 0.441216  | 16.625776 | -6.073612 |
| 8 | 1.034607  | 16.331986 | -5.046864 |
| 7 | 0.139544  | 15.718579 | -7.032648 |
| 1 | 0.489029  | 14.781279 | -6.924452 |
| 1 | -0.264563 | 15.988788 | -7.911398 |
| 1 | -0.164462 | 18.557127 | -4.254715 |
| 1 | -1.099413 | 18.073475 | -6.52169  |
| 1 | 0.483783  | 18.431478 | -7.234278 |
| 7 | 2.306386  | 18.972784 | -3.733714 |
| 6 | 3.71668   | 19.051104 | -3.34786  |
| 6 | 4.281287  | 20.438918 | -3.643997 |
| 8 | 4.792248  | 21.128295 | -2.786025 |
| 6 | 4.561967  | 17.934849 | -3.975503 |
| 6 | 6.049504  | 18.019508 | -3.614994 |
| 6 | 6.27727   | 18.00898  | -2.101882 |
| 6 | 6.791205  | 16.858312 | -4.278514 |
| 1 | 3.727681  | 18.95971  | -2.264296 |
| 1 | 4.147213  | 16.985207 | -3.622897 |
| 1 | 4.44223   | 17.955942 | -5.05984  |
| 1 | 6.450786  | 18.956113 | -4.01943  |
| 1 | 7.345005  | 17.95542  | -1.878915 |
| 1 | 5.880254  | 18.905262 | -1.623086 |
| 1 | 5.793613  | 17.135897 | -1.652478 |
| 1 | 7.863875  | 16.920972 | -4.085996 |
| 1 | 6.432417  | 15.904228 | -3.8824   |
| 1 | 6.637017  | 16.85472  | -5.359664 |
| 8 | 4.196075  | 20.873209 | -4.895497 |
| 1 | 3.687743  | 20.233741 | -5.470308 |
| 1 | 1.661084  | 18.787902 | -2.980829 |
| 1 | 0.499273  | 20.877675 | -5.966507 |
| 1 | 0.401271  | 23.721073 | -3.520392 |
| 1 | 3.888672  | 22.873947 | -3.34299  |

Cartesian coordinates of conformer **W3**, calculated at the M05-2X/6-31G\* level

| atomic # | x         | y         | z         |
|----------|-----------|-----------|-----------|
| 1        | 0.276701  | 4.137331  | -5.070183 |
| 7        | 0.186911  | 4.77613   | -4.285773 |
| 6        | -0.216884 | 4.056154  | -3.08225  |
| 6        | 1.005954  | 3.711147  | -2.224244 |
| 8        | 0.897021  | 3.022351  | -1.203004 |
| 6        | -0.951569 | 2.72597   | -3.319346 |
| 6        | -2.16508  | 2.810771  | -4.19093  |
| 6        | -2.860112 | 3.896132  | -4.644632 |
| 6        | -2.834485 | 1.659602  | -4.737672 |
| 7        | -3.935121 | 3.495006  | -5.411587 |
| 6        | -3.916011 | 2.128931  | -5.518382 |
| 6        | -2.591015 | 0.282007  | -4.652361 |
| 6        | -4.735018 | 1.258121  | -6.24582  |
| 6        | -3.403915 | -0.585698 | -5.36279  |
| 6        | -4.461566 | -0.100809 | -6.156931 |
| 1        | -4.431702 | 4.101758  | -6.039765 |
| 1        | -0.846992 | 4.706916  | -2.469342 |
| 1        | -0.245821 | 2.027793  | -3.783999 |
| 1        | -1.199042 | 2.298346  | -2.345713 |
| 1        | -2.695046 | 4.946951  | -4.471915 |
| 1        | -1.772058 | -0.093066 | -4.050367 |
| 1        | -5.549504 | 1.627586  | -6.855958 |
| 1        | -3.22262  | -1.651987 | -5.318739 |
| 1        | -5.075202 | -0.80073  | -6.709356 |
| 1        | 2.083646  | 4.724629  | -3.539662 |
| 7        | 2.175477  | 4.156254  | -2.703942 |
| 6        | 3.482607  | 3.90888   | -2.12045  |
| 6        | 4.025589  | 2.515655  | -2.474088 |
| 8        | 5.161646  | 2.374196  | -2.892379 |
| 6        | 3.559566  | 4.107681  | -0.599567 |
| 16       | 2.984915  | 5.744801  | -0.05001  |
| 1        | 1.677463  | 5.454015  | -0.14288  |
| 1        | 4.171674  | 4.607418  | -2.590208 |
| 1        | 2.99833   | 3.341292  | -0.074553 |
| 1        | 4.608553  | 4.03643   | -0.311579 |
| 1        | 2.25825   | 1.668971  | -1.84746  |
| 7        | 3.16284   | 1.481574  | -2.270225 |
| 6        | 3.54539   | 0.12578   | -2.598329 |
| 6        | 3.068937  | -0.317405 | -3.982392 |
| 8        | 3.338808  | -1.446825 | -4.397989 |
| 6        | 3.052557  | -0.88538  | -1.54642  |
| 6        | 1.545926  | -0.961493 | -1.472495 |
| 6        | 0.844436  | -1.882782 | -2.25713  |
| 6        | 0.824028  | -0.091366 | -0.654273 |
| 6        | -0.545809 | -1.923364 | -2.230192 |
| 6        | -0.568146 | -0.121588 | -0.634087 |
| 6        | -1.257219 | -1.038061 | -1.421467 |
| 1        | 4.635315  | 0.102439  | -2.636551 |
| 1        | 3.463589  | -1.857683 | -1.817565 |
| 1        | 3.468644  | -0.59299  | -0.580543 |
| 1        | 1.399489  | -2.571421 | -2.883456 |
| 1        | 1.348247  | 0.622755  | -0.029888 |
| 1        | -1.075677 | -2.648888 | -2.836159 |
| 1        | -1.106835 | 0.573965  | -0.003385 |



|   |           |           |            |
|---|-----------|-----------|------------|
| 1 | -2.339703 | -1.06464  | -1.407715  |
| 1 | 2.201282  | 1.509995  | -4.355224  |
| 7 | 2.343702  | 0.565541  | -4.686361  |
| 6 | 1.93381   | 0.265696  | -6.033481  |
| 6 | 1.28889   | 1.513993  | -6.629298  |
| 8 | 1.183141  | 2.549024  | -5.973908  |
| 6 | 0.943071  | -0.929665 | -6.108666  |
| 6 | 1.401834  | -1.802641 | -7.256215  |
| 8 | 1.087029  | -1.554353 | -8.417878  |
| 7 | 2.244835  | -2.79334  | -6.898111  |
| 1 | 2.728702  | -3.275196 | -7.638966  |
| 1 | 2.688844  | -2.725913 | -5.989961  |
| 1 | 2.823368  | 0.023357  | -6.624739  |
| 1 | 0.96515   | -1.467481 | -5.164185  |
| 1 | -0.073757 | -0.587726 | -6.30451   |
| 1 | 0.83204   | 0.43018   | -8.287261  |
| 7 | 0.859599  | 1.372363  | -7.893788  |
| 6 | 0.026324  | 2.388814  | -8.502836  |
| 6 | -1.415868 | 2.31063   | -8.019209  |
| 8 | -2.15742  | 3.262307  | -7.966627  |
| 6 | 0.034034  | 2.242129  | -10.029098 |
| 6 | 1.431189  | 2.304811  | -10.656434 |
| 6 | 1.303425  | 2.199507  | -12.176727 |
| 6 | 2.173899  | 3.582506  | -10.266169 |
| 1 | 0.397827  | 3.367523  | -8.208015  |
| 1 | -0.443125 | 1.291589  | -10.29081  |
| 1 | -0.589502 | 3.042303  | -10.439676 |
| 1 | 2.006733  | 1.445431  | -10.299093 |
| 1 | 2.287227  | 2.183961  | -12.64966  |
| 1 | 0.77169   | 1.291125  | -12.467932 |
| 1 | 0.752454  | 3.057113  | -12.573321 |
| 1 | 3.122706  | 3.650714  | -10.801935 |
| 1 | 1.579404  | 4.464514  | -10.523104 |
| 1 | 2.394971  | 3.617044  | -9.197685  |
| 1 | -0.482098 | 5.489025  | -4.534612  |
| 8 | -1.777711 | 1.054857  | -7.737191  |
| 1 | -2.701053 | 1.059703  | -7.416213  |

Cartesian coordinates of conformer **W4**, calculated at the M05-2X/6-31G\* level

| atomic # | x         | y         | z         |
|----------|-----------|-----------|-----------|
| 1        | 5.844679  | 24.267389 | -1.095432 |
| 7        | 4.999424  | 24.17054  | -0.544649 |
| 6        | 4.055932  | 23.270517 | -1.210426 |
| 6        | 3.574919  | 23.915027 | -2.507756 |
| 8        | 2.738829  | 24.826943 | -2.496973 |
| 6        | 2.868104  | 23.030973 | -0.275363 |
| 6        | 1.828709  | 22.102875 | -0.829736 |
| 6        | 0.748351  | 22.445364 | -1.598529 |
| 6        | 1.746023  | 20.676809 | -0.646815 |
| 7        | -0.011554 | 21.336126 | -1.885414 |
| 6        | 0.582742  | 20.234608 | -1.325922 |
| 6        | 2.542926  | 19.73561  | 0.021613  |
| 6        | 0.209088  | 18.886683 | -1.371385 |
| 6        | 2.177146  | 18.400052 | -0.017843 |
| 6        | 1.025497  | 17.978107 | -0.713571 |
| 1        | -0.758166 | 21.321385 | -2.566164 |
| 1        | 4.568191  | 22.328878 | -1.415755 |
| 1        | 3.271463  | 22.641961 | 0.660631  |
| 1        | 2.416669  | 24.002309 | -0.061657 |
| 1        | 0.448776  | 23.423635 | -1.939853 |
| 1        | 3.445143  | 20.042503 | 0.534568  |
| 1        | -0.669862 | 18.559403 | -1.911936 |
| 1        | 2.787228  | 17.664793 | 0.492194  |
| 1        | 0.767817  | 16.926709 | -0.735068 |
| 7        | 4.187862  | 23.526998 | -3.64661  |
| 6        | 3.949613  | 24.224144 | -4.900139 |
| 6        | 2.710296  | 23.660402 | -5.611877 |
| 8        | 2.791373  | 23.032075 | -6.671452 |
| 6        | 5.17523   | 24.199712 | -5.809111 |
| 16       | 5.89478   | 22.551537 | -6.117838 |
| 1        | 4.822375  | 22.065166 | -6.758744 |
| 1        | 3.728863  | 25.262796 | -4.640039 |
| 1        | 4.92301   | 24.668537 | -6.758481 |
| 1        | 5.971199  | 24.776968 | -5.33989  |
| 1        | 4.575359  | 25.090648 | -0.476675 |
| 7        | 1.556283  | 23.894571 | -4.967852 |
| 6        | 0.24539   | 23.413188 | -5.386486 |
| 6        | 0.032034  | 21.923774 | -5.08922  |
| 8        | -1.015336 | 21.537662 | -4.571883 |
| 6        | -0.108211 | 23.731966 | -6.854244 |
| 6        | -0.011019 | 25.209918 | -7.139099 |
| 6        | -1.030218 | 26.074438 | -6.73606  |
| 6        | 1.111365  | 25.739645 | -7.776663 |
| 6        | -0.932243 | 27.442734 | -6.965011 |
| 6        | 1.210979  | 27.108619 | -8.009251 |
| 6        | 0.190542  | 27.963267 | -7.6032   |
| 1        | -0.47952  | 23.921647 | -4.751627 |
| 1        | 0.549025  | 23.172326 | -7.516156 |
| 1        | -1.132204 | 23.381304 | -7.006578 |
| 1        | -1.910097 | 25.669629 | -6.246762 |
| 1        | 1.904278  | 25.070304 | -8.089683 |
| 1        | -1.73254  | 28.100861 | -6.650761 |
| 1        | 2.084189  | 27.507309 | -8.510554 |
| 1        | 0.267248  | 29.027647 | -7.785635 |

|   |           |           |           |
|---|-----------|-----------|-----------|
| 7 | 1.041044  | 21.101403 | -5.42655  |
| 6 | 1.111554  | 19.739073 | -4.944188 |
| 6 | 2.574238  | 19.506249 | -4.570479 |
| 8 | 3.458593  | 19.988268 | -5.30146  |
| 6 | 0.64741   | 18.733385 | -6.000348 |
| 6 | 0.485839  | 17.344072 | -5.40371  |
| 8 | 0.44303   | 17.151717 | -4.197517 |
| 7 | 0.373508  | 16.340548 | -6.304914 |
| 1 | 0.198309  | 15.41036  | -5.963518 |
| 1 | 0.372441  | 16.507348 | -7.295199 |
| 1 | 0.471456  | 19.645902 | -4.069827 |
| 1 | -0.326894 | 19.067336 | -6.367412 |
| 1 | 1.341131  | 18.723721 | -6.844774 |
| 7 | 2.813053  | 18.810721 | -3.462166 |
| 6 | 4.138395  | 18.450213 | -2.949914 |
| 6 | 4.928153  | 19.67431  | -2.471404 |
| 8 | 5.375586  | 19.761529 | -1.35639  |
| 6 | 4.951605  | 17.614443 | -3.949104 |
| 6 | 6.361488  | 17.26739  | -3.454891 |
| 6 | 6.33784   | 16.545982 | -2.105884 |
| 6 | 7.066242  | 16.413975 | -4.50993  |
| 1 | 3.947721  | 17.874288 | -2.049111 |
| 1 | 4.390644  | 16.691587 | -4.131304 |
| 1 | 5.015944  | 18.148001 | -4.899037 |
| 1 | 6.924038  | 18.200577 | -3.33865  |
| 1 | 7.341606  | 16.210074 | -1.838049 |
| 1 | 5.98271   | 17.197307 | -1.306368 |
| 1 | 5.691989  | 15.663573 | -2.156719 |
| 1 | 8.093174  | 16.197178 | -4.210197 |
| 1 | 6.544943  | 15.460967 | -4.638279 |
| 1 | 7.092784  | 16.919254 | -5.477834 |
| 8 | 5.139491  | 20.631913 | -3.381857 |
| 1 | 4.695664  | 20.412107 | -4.242017 |
| 1 | 2.010103  | 18.470763 | -2.941689 |
| 1 | 1.85584   | 21.465528 | -5.911998 |
| 1 | 1.634836  | 24.389758 | -4.082987 |
| 1 | 4.777218  | 22.700892 | -3.649806 |

Cartesian coordinates of conformer **W5**, calculated at the M05-2X/6-31G\* level

| atomic # | x         | y         | z         |
|----------|-----------|-----------|-----------|
| 1        | 4.48749   | 25.307265 | 0.457937  |
| 7        | 3.658029  | 24.899883 | 0.876508  |
| 6        | 3.252036  | 23.719774 | 0.123917  |
| 6        | 2.813018  | 24.101814 | -1.287715 |
| 8        | 1.93044   | 24.948117 | -1.46864  |
| 6        | 2.085836  | 23.030419 | 0.840612  |
| 6        | 1.623031  | 21.817844 | 0.095922  |
| 6        | 0.523619  | 21.734122 | -0.715032 |
| 6        | 2.296909  | 20.551215 | -0.017961 |
| 7        | 0.456544  | 20.500563 | -1.307964 |
| 6        | 1.534355  | 19.75322  | -0.914096 |
| 6        | 3.474859  | 20.019193 | 0.530857  |
| 6        | 1.929392  | 18.458295 | -1.280859 |
| 6        | 3.869311  | 18.742839 | 0.170014  |
| 6        | 3.106756  | 17.973116 | -0.730202 |
| 1        | -0.240067 | 20.27679  | -2.003531 |
| 1        | 4.099823  | 23.032264 | 0.069767  |
| 1        | 2.414524  | 22.790298 | 1.853722  |
| 1        | 1.268171  | 23.751391 | 0.918479  |
| 1        | -0.230523 | 22.474111 | -0.930054 |
| 1        | 4.069023  | 20.603522 | 1.223395  |
| 1        | 1.34829   | 17.863811 | -1.975826 |
| 1        | 4.779881  | 18.326895 | 0.580886  |
| 1        | 3.439789  | 16.976841 | -0.993857 |
| 7        | 3.471662  | 23.522726 | -2.307437 |
| 6        | 3.317903  | 23.988728 | -3.670877 |
| 6        | 2.143928  | 23.28767  | -4.371621 |
| 8        | 2.318719  | 22.462019 | -5.270013 |
| 6        | 4.605     | 23.80478  | -4.467552 |
| 16       | 6.00242   | 24.754799 | -3.782636 |
| 1        | 5.488955  | 25.971534 | -4.032561 |
| 1        | 3.066922  | 25.050197 | -3.602367 |
| 1        | 4.924008  | 22.762863 | -4.459927 |
| 1        | 4.43567   | 24.080468 | -5.506129 |
| 1        | 2.918988  | 25.59109  | 0.783808  |
| 7        | 0.934549  | 23.685791 | -3.935852 |
| 6        | -0.332083 | 23.278714 | -4.543034 |
| 6        | -0.594281 | 21.782476 | -4.321312 |
| 8        | -1.200585 | 21.40863  | -3.319284 |
| 6        | -0.449526 | 23.749128 | -6.003126 |
| 6        | -1.800084 | 23.413186 | -6.594416 |
| 6        | -2.948822 | 24.055952 | -6.128349 |
| 6        | -1.925962 | 22.449911 | -7.597189 |
| 6        | -4.200278 | 23.741094 | -6.64707  |
| 6        | -3.177935 | 22.135907 | -8.119749 |
| 6        | -4.317715 | 22.777791 | -7.645213 |
| 1        | -1.112154 | 23.761115 | -3.956109 |
| 1        | -0.298454 | 24.831615 | -5.996732 |
| 1        | 0.353242  | 23.322787 | -6.605979 |
| 1        | -2.863026 | 24.81674  | -5.359452 |
| 1        | -1.043722 | 21.939527 | -7.967413 |
| 1        | -5.080932 | 24.249958 | -6.276153 |
| 1        | -3.2599   | 21.392157 | -8.902914 |
| 1        | -5.290518 | 22.533426 | -8.052659 |

|   |           |           |           |
|---|-----------|-----------|-----------|
| 7 | -0.11771  | 20.938413 | -5.253318 |
| 6 | -0.245475 | 19.507271 | -5.13391  |
| 6 | 1.055417  | 18.80525  | -4.716245 |
| 8 | 1.05939   | 17.589904 | -4.544268 |
| 6 | -0.700951 | 18.883177 | -6.464425 |
| 6 | 0.392232  | 19.086028 | -7.496832 |
| 8 | 0.68821   | 20.204493 | -7.905287 |
| 7 | 1.035809  | 17.967477 | -7.89921  |
| 1 | 1.859911  | 18.086947 | -8.467184 |
| 1 | 0.933581  | 17.110418 | -7.381487 |
| 1 | -0.992252 | 19.303423 | -4.367813 |
| 1 | -0.916306 | 17.828915 | -6.300903 |
| 1 | -1.600441 | 19.39794  | -6.803674 |
| 7 | 2.148942  | 19.585535 | -4.612331 |
| 6 | 3.469172  | 18.986596 | -4.437295 |
| 6 | 4.380664  | 20.086294 | -3.898804 |
| 8 | 5.36514   | 20.486425 | -4.462948 |
| 6 | 4.008123  | 18.378405 | -5.728933 |
| 6 | 5.30127   | 17.567384 | -5.576    |
| 6 | 5.15822   | 16.457571 | -4.530422 |
| 6 | 5.669638  | 16.966807 | -6.93354  |
| 1 | 3.362718  | 18.214949 | -3.672285 |
| 1 | 3.225432  | 17.71592  | -6.109424 |
| 1 | 4.156076  | 19.184595 | -6.452388 |
| 1 | 6.099318  | 18.246244 | -5.269553 |
| 1 | 6.027294  | 15.796813 | -4.554146 |
| 1 | 5.078228  | 16.852027 | -3.514961 |
| 1 | 4.26719   | 15.854249 | -4.729946 |
| 1 | 6.618843  | 16.430343 | -6.879542 |
| 1 | 4.902158  | 16.256669 | -7.25752  |
| 1 | 5.760935  | 17.742359 | -7.697156 |
| 8 | 3.989177  | 20.641521 | -2.740033 |
| 1 | 3.21129   | 20.187879 | -2.359991 |
| 1 | 2.094935  | 20.557553 | -4.905507 |
| 1 | 0.371257  | 21.296766 | -6.064049 |
| 1 | 0.929476  | 24.298721 | -3.123622 |
| 1 | 4.080366  | 22.733535 | -2.140714 |

Cartesian coordinates of conformer **W6**, calculated at the M05-2X/6-31G\* level

| atomic # | x         | y         | z         |
|----------|-----------|-----------|-----------|
| 1        | -0.282454 | 1.263165  | -0.836207 |
| 7        | -0.800867 | 2.08124   | -1.143664 |
| 6        | -1.156116 | 1.947929  | -2.557675 |
| 6        | 0.045148  | 2.3224    | -3.412426 |
| 8        | 0.213714  | 1.904044  | -4.557784 |
| 6        | -2.309749 | 2.92707   | -2.864937 |
| 6        | -2.831877 | 2.824274  | -4.26037  |
| 6        | -2.584983 | 3.670501  | -5.303741 |
| 6        | -3.662787 | 1.771919  | -4.782562 |
| 7        | -3.207329 | 3.213665  | -6.441449 |
| 6        | -3.872743 | 2.048177  | -6.154851 |
| 6        | -4.234553 | 0.617097  | -4.224013 |
| 6        | -4.626457 | 1.205772  | -6.977968 |
| 6        | -4.983856 | -0.217387 | -5.034399 |
| 6        | -5.175532 | 0.074622  | -6.398668 |
| 1        | -3.160743 | 3.65492   | -7.34177  |
| 1        | -1.431183 | 0.934615  | -2.8688   |
| 1        | -3.117094 | 2.709515  | -2.1568   |
| 1        | -1.964124 | 3.942318  | -2.651795 |
| 1        | -1.995767 | 4.573953  | -5.324319 |
| 1        | -4.074542 | 0.37244   | -3.181119 |
| 1        | -4.771536 | 1.426008  | -8.028154 |
| 1        | -5.419396 | -1.116891 | -4.620031 |
| 1        | -5.758681 | -0.603212 | -7.008324 |
| 1        | 0.706187  | 3.489049  | -1.895455 |
| 7        | 0.9295    | 3.161456  | -2.827337 |
| 6        | 2.092233  | 3.602036  | -3.557918 |
| 6        | 3.043049  | 2.443334  | -3.892365 |
| 8        | 3.835674  | 2.538382  | -4.819722 |
| 6        | 2.888032  | 4.638656  | -2.76768  |
| 16       | 1.946072  | 6.139663  | -2.337284 |
| 1        | 1.708402  | 6.521878  | -3.603013 |
| 1        | 1.797075  | 4.007438  | -4.528923 |
| 1        | 3.207566  | 4.213688  | -1.814146 |
| 1        | 3.780398  | 4.898219  | -3.333627 |
| 1        | 2.249274  | 1.345569  | -2.36868  |
| 7        | 2.971704  | 1.373109  | -3.073004 |
| 6        | 3.739147  | 0.173113  | -3.319674 |
| 6        | 3.216143  | -0.683173 | -4.483106 |
| 8        | 3.842132  | -1.678808 | -4.813471 |
| 6        | 3.877394  | -0.658649 | -2.033249 |
| 6        | 2.594574  | -0.783285 | -1.23787  |
| 6        | 1.408341  | -1.233067 | -1.827672 |
| 6        | 2.571978  | -0.428469 | 0.11356   |
| 6        | 0.238752  | -1.347263 | -1.081308 |
| 6        | 1.407899  | -0.551567 | 0.868101  |
| 6        | 0.238008  | -1.01817  | 0.273476  |
| 1        | 4.733074  | 0.47531   | -3.652484 |
| 1        | 4.245538  | -1.641365 | -2.334264 |
| 1        | 4.639676  | -0.197881 | -1.402909 |
| 1        | 1.366602  | -1.496607 | -2.876106 |
| 1        | 3.479408  | -0.063933 | 0.581709  |
| 1        | -0.658695 | -1.686262 | -1.5814   |
| 1        | 1.417023  | -0.284194 | 1.917535  |

|   |           |           |            |
|---|-----------|-----------|------------|
| 1 | -0.667351 | -1.119858 | 0.859645   |
| 1 | 1.516462  | 0.469839  | -4.697921  |
| 7 | 2.099941  | -0.249502 | -5.1139    |
| 6 | 1.58233   | -0.962855 | -6.258778  |
| 6 | 1.17432   | -0.008745 | -7.384718  |
| 8 | 0.405397  | -0.375849 | -8.272417  |
| 6 | 0.443916  | -1.931254 | -5.902638  |
| 6 | -0.725513 | -1.21577  | -5.245427  |
| 8 | -0.838104 | -1.153952 | -4.02226   |
| 7 | -1.601445 | -0.660405 | -6.101987  |
| 1 | -2.322431 | -0.063145 | -5.725783  |
| 1 | -1.369651 | -0.605601 | -7.082778  |
| 1 | 2.413291  | -1.558418 | -6.644077  |
| 1 | 0.12619   | -2.434346 | -6.815409  |
| 1 | 0.830529  | -2.663818 | -5.195591  |
| 1 | 2.296891  | 1.500932  | -6.574726  |
| 7 | 1.751131  | 1.204529  | -7.373629  |
| 6 | 1.484574  | 2.152789  | -8.44275   |
| 6 | 2.625651  | 3.148035  | -8.469462  |
| 8 | 3.323599  | 3.406194  | -9.415017  |
| 6 | 0.144064  | 2.884578  | -8.264989  |
| 6 | -0.0688   | 4.004575  | -9.292333  |
| 6 | 0.053792  | 3.496398  | -10.731453 |
| 6 | -1.432039 | 4.663028  | -9.081865  |
| 1 | 1.497288  | 1.608724  | -9.384431  |
| 1 | -0.645594 | 2.13291   | -8.355707  |
| 1 | 0.104682  | 3.279117  | -7.245624  |
| 1 | 0.69822   | 4.771046  | -9.131002  |
| 1 | -0.225634 | 4.280419  | -11.438632 |
| 1 | 1.07337   | 3.18882   | -10.965667 |
| 1 | -0.611592 | 2.642764  | -10.891086 |
| 1 | -1.569844 | 5.506325  | -9.761081  |
| 1 | -2.229977 | 3.941204  | -9.288245  |
| 1 | -1.538114 | 5.034096  | -8.058407  |
| 1 | -1.644066 | 2.11622   | -0.582443  |
| 8 | 2.758263  | 3.742039  | -7.266581  |
| 1 | 3.580597  | 4.257575  | -7.275723  |
